# Supplementary material for: Novel Tools for Conservation Genomics: Comparing Two High-Throughput Approaches for SNP Discovery in the Transcriptome of the European Hake
Source: PubMed Central journal article supplement (PMC3222667; doi:10.1371/journal.pone.0028008), 2011-11-22

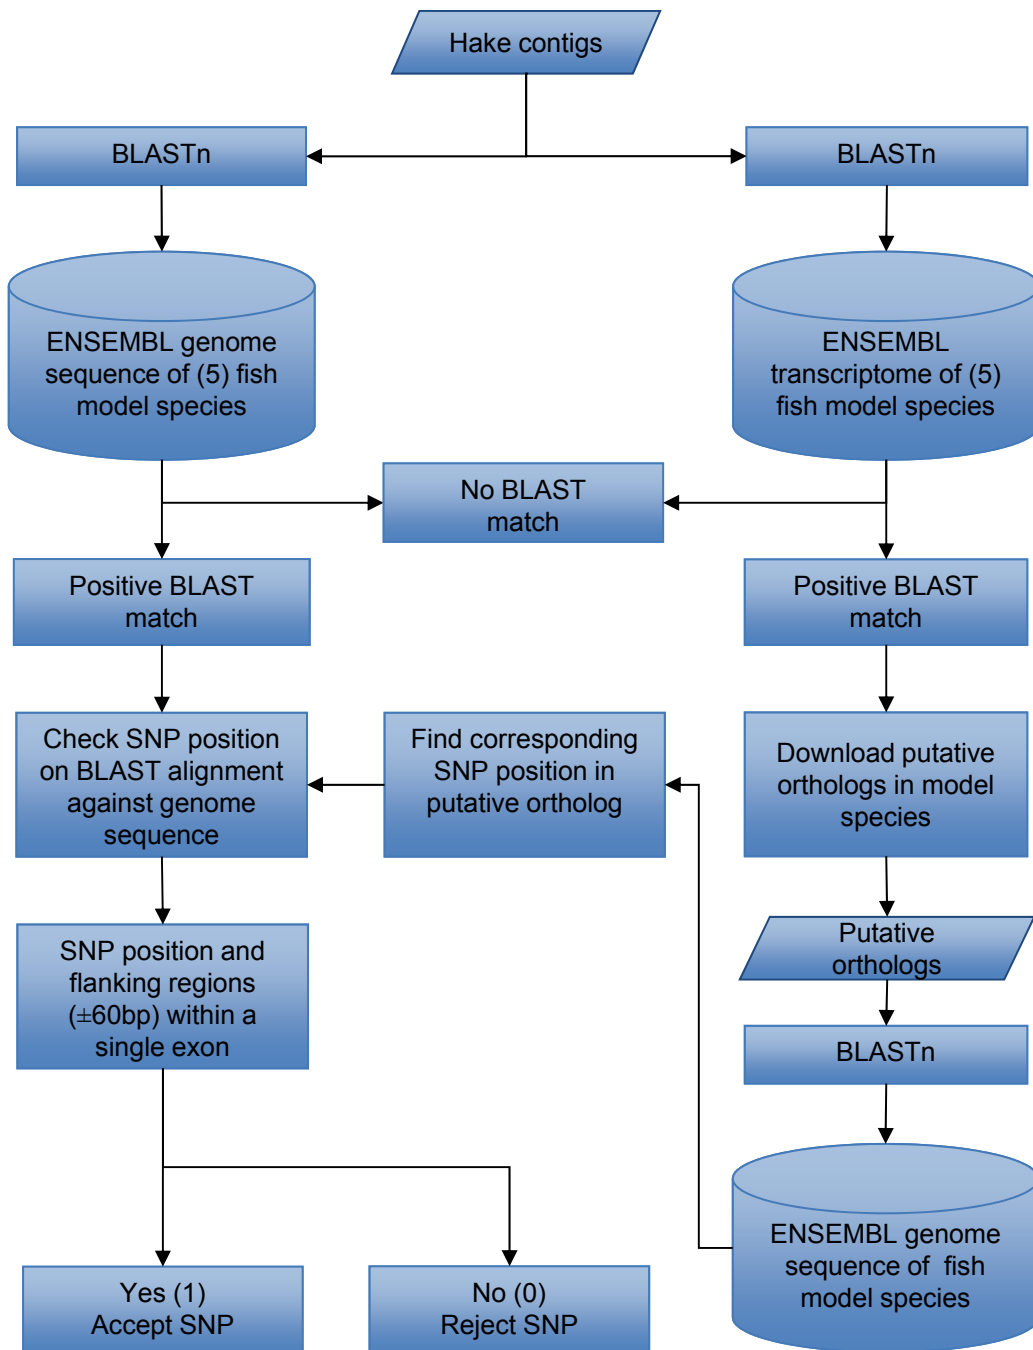

Supplement: pone.0028008.s003.pdf [file pone.0028008.s003.pdf]
