# Supplementary material for: Novel Tools for Conservation Genomics: Comparing Two High-Throughput Approaches for SNP Discovery in the Transcriptome of the European Hake
Source: PubMed Central journal article supplement (PMC3222667; doi:10.1371/journal.pone.0028008), 2011-11-22
Supplement: pone.0028008.s004.pdf [file pone.0028008.s004.pdf]

| GO-ID      | Term                                                     | Category | FDR        | P-Value    | Over/Under |
|------------|----------------------------------------------------------|----------|------------|------------|------------|
| GO:0006412 | translation                                              | P        | 2.40E-04   | 0.0        | over       |
| GO:0003735 | structural constituent of ribosome                       | F        | 2.40E-04   | 0.0        | over       |
| GO:0005840 | ribosome                                                 | C        | 2.40E-04   | 0.0        | over       |
| GO:0030529 | ribonucleoprotein complex                                | C        | 2.40E-04   | 1.32E-08   | over       |
| GO:0009058 | biosynthetic process                                     | P        | 2.40E-04   | 6.80E-08   | over       |
| GO:0034645 | cellular macromolecule biosynthetic process              | P        | 2.40E-04   | 9.78E-08   | over       |
| GO:0009059 | macromolecule biosynthetic process                       | P        | 2.40E-04   | 9.78E-08   | over       |
| GO:0044249 | cellular biosynthetic process                            | P        | 2.40E-04   | 1.88E-07   | over       |
| GO:0044444 | cytoplasmic part                                         | C        | 5.72E-03   | 2.62E-04   | over       |
| GO:0043232 | intracellular non-membrane-bounded organelle             | C        | 1.00E-01   | 4.90E-03   | over       |
| GO:0043228 | non-membrane-bounded organelle                           | C        | 1.00E-01   | 4.90E-03   | over       |
| GO:0005198 | structural molecule activity                             | F        | 7.90E+00   | 3.91E-01   | over       |
| GO:0032991 | macromolecular complex                                   | C        | 0.00200569 | 8.51E+00   | over       |
| GO:0033279 | ribosomal subunit                                        | C        | 0.0113124  | 5.11E+01   | over       |
| GO:0006091 | generation of precursor metabolites and energy           | P        | 0.0113124  | 5.19E+01   | over       |
| GO:0016868 | intramolecular transferase activity, phosphotransferases | F        | 0.02043    | 8.30E+01   | over       |
| GO:0044424 | intracellular part                                       | C        | 0.0231671  | 9.97E+01   | over       |
| GO:0005975 | carbohydrate metabolic process                           | P        | 0.0332324  | 0.00171534 | over       |
| GO:0022900 | electron transport chain                                 | P        | 0.0332324  | 0.00178515 | over       |
| GO:0016866 | intramolecular transferase activity                      | F        | 0.0344973  | 0.00197345 | over       |
| GO:0006414 | translational elongation                                 | P        | 0.0350837  | 0.00206099 | over       |
| GO:0030170 | pyridoxal phosphate binding                              | F        | 0.0422907  | 0.00290272 | over       |
| GO:0022904 | respiratory electron transport chain                     | P        | 0.0422907  | 0.00290272 | over       |
| GO:0070279 | vitamin B6 binding                                       | F        | 0.0422907  | 0.00290272 | over       |
| GO:0008152 | metabolic process                                        | P        | 0.0422907  | 0.00292836 | over       |
