# Supplementary material for: Novel Tools for Conservation Genomics: Comparing Two High-Throughput Approaches for SNP Discovery in the Transcriptome of the European Hake
Source: PubMed Central journal article supplement (PMC3222667; doi:10.1371/journal.pone.0028008), 2011-11-22
Supplement: pone.0028008.s005.pdf [file pone.0028008.s005.pdf]

| GO-ID      | Term                                                    | Category | FDR        | P-Value    | Over/Under |
|------------|---------------------------------------------------------|----------|------------|------------|------------|
| GO:0003735 | structural constituent of ribosome                      | F        | 5.73E-01   | 9.95E-03   | over       |
| GO:0030529 | ribonucleoprotein complex                               | C        | 5.73E-01   | 1.59E-02   | over       |
| GO:0032991 | macromolecular complex                                  | C        | 5.73E-01   | 1.67E-02   | over       |
| GO:0005840 | ribosome                                                | C        | 8.87E-01   | 4.06E-02   | over       |
| GO:0043228 | non-membrane-bounded organelle                          | C        | 8.87E-01   | 5.62E-02   | over       |
| GO:0043232 | intracellular non-membrane-bounded organelle            | C        | 8.87E-01   | 5.62E-02   | over       |
| GO:0005198 | structural molecule activity                            | F        | 2.57E+00   | 1.71E-01   | over       |
| GO:0016459 | myosin complex                                          | C        | 9.29E+00   | 6.18E-01   | over       |
| GO:0006412 | translation                                             | P        | 1.38E+00   | 1.11E+00   | over       |
| GO:0034645 | cellular macromolecule biosynthetic process             | P        | 1.38E+00   | 1.28E+00   | over       |
| GO:0009059 | macromolecule biosynthetic process                      | P        | 1.38E+00   | 1.28E+00   | over       |
| GO:0003779 | actin binding                                           | F        | 1.41E+01   | 1.55E+00   | over       |
| GO:0008092 | cytoskeletal protein binding                            | F        | 1.41E+01   | 1.55E+00   | over       |
| GO:0003774 | motor activity                                          | F        | 4.85E+01   | 4.79E-01   | over       |
| GO:0032982 | myosin filament                                         | C        | 5.64E+01   | 6.45E+00   | over       |
| GO:0044430 | cytoskeletal part                                       | C        | 8.65E+01   | 9.14E+00   | over       |
| GO:0044424 | intracellular part                                      | C        | 8.98E+01   | 1.03E+01   | over       |
| GO:0044422 | organelle part                                          | C        | 0.00153193 | 2.07E+01   | over       |
| GO:0044446 | intracellular organelle part                            | C        | 0.00153193 | 2.07E+01   | over       |
| GO:0016818 | hydrolase activity, in phosphorus-containing anhydrides | F        | 0.00512314 | 6.35E+01   | over       |
| GO:0017111 | nucleoside-triphosphatase activity                      | F        | 0.00512314 | 6.35E+01   | over       |
| GO:0016462 | pyrophosphatase activity                                | F        | 0.00512314 | 6.35E+01   | over       |
| GO:0016817 | hydrolase activity, acting on acid anhydrides           | F        | 0.00644593 | 8.50E+01   | over       |
| GO:0005515 | protein binding                                         | F        | 0.00721798 | 0.00109514 | over       |
| GO:0044464 | cell part                                               | C        | 0.0107931  | 0.00153039 | over       |
| GO:0044249 | cellular biosynthetic process                           | P        | 0.0139449  | 0.00177106 | over       |
| GO:0009058 | biosynthetic process                                    | P        | 0.0222579  | 0.00294704 | over       |
| GO:0005524 | ATP binding                                             | F        | 0.0401276  | 0.00505448 | over       |
| GO:0032559 | adenyl ribonucleotide binding                           | F        | 0.0401276  | 0.00505448 | over       |
| GO:0032555 | purine ribonucleotide binding                           | F        | 0.0434069  | 0.00597614 | over       |
| GO:0032553 | ribonucleotide binding                                  | F        | 0.0434069  | 0.00597614 | over       |
| GO:0016787 | hydrolase activity                                      | F        | 0.047443   | 0.00745794 | over       |
| GO:0043226 | organelle                                               | C        | 0.047443   | 0.00751754 | over       |
| GO:0043229 | intracellular organelle                                 | C        | 0.047443   | 0.00751754 | over       |
| GO:0030554 | adenyl nucleotide binding                               | F        | 0.047443   | 0.0080511  | over       |
| GO:0001883 | purine nucleoside binding                               | F        | 0.047443   | 0.0080511  | over       |
| GO:0001882 | nucleoside binding                                      | F        | 0.047443   | 0.0080511  | over       |
